# Supplementary material for: Insights Into the Prognostic Value and Immunological Role of NAAA in Pan-Cancer
Source: Front Immunol. 2022 Jan 6;12:812713. doi: 10.3389/fimmu.2021.812713 (PMC8772335; doi:10.3389/fimmu.2021.812713)
Supplement: Supplementary file 2 [file Table_1.xlsx]

## Sheet: Sheet1
Tumor type	Sample size of tumor tissues from TCGA	Sample size of normal tissues from TCGA	Sample size of normal tissues from GTEx
ACC	77	0	128
BLCA	407	19	9
BRCA	1098	113	179
CESC	306	3	10
CHOL	36	9	0
COAD	288	41	308
DLBC	47	0	444
ESCA	182	13	653
GBM	165	0	1152
HNSC	520	44	0
KICH	66	25	28
KIRC	531	72	28
KIRP	289	32	28
LAML	173	0	70
LGG	522	0	1152
LIHC	371	50	110
LUAD	515	59	288
LUSC	498	50	288
MESO	87	0	0
OV	427	0	88
PAAD	179	4	167
PCPG	182	3	0
PRAD	496	52	100
READ	92	10	308
SARC	262	2	0
SKCM	469	1	812
STAD	414	36	174
TGCT	137	0	165
THCA	512	59	279
THYM	119	2	444
UCEC	181	13	89
UCS	57	0	89
UVM	79	0	0
	9861	712	7718
